# Supplementary material for: Technical note: Altitude scaling of 36 Cl production from Fe
Source: Copernicus journal article supplement (doi:10.5194/gchron-6-541-2024), 2024-10-18
Supplement: Supplementary file 1 [file gchron-6-541-2024-supplement.zip]

## Sheet: AMS Data
Table S1. Sample masses, spike masses, and isotope ratios measured by AMS at PRIME Lab
	Sample Mass	Carrier Mass1		Rare/Stable				Stable/Stable
				10Be/9Be		36Cl/Cl		35Cl/37Cl
ID	g	mg Be	mg Cl	x 10-15	±	x 10-15	±		±
OV19-1
Quartz	19.784	0.294784	-	283.29	10.4683	-	-	-	-
Feldspar	10.0992	-	1.12502	-	-	240.575	6.17117	13.151	0.089
Magnetite	10.029	-	1.12903	-	-	44.126	2.62711	28.367	0.293
OV19-2
Quartz	17.205	0.296311	-	251.727	7.50062	-	-	-	-
Feldspar	10.4303	-	1.12302	-	-	213.759	5.66795	10.564	0.034
Magnetite	19.129	-	1.13916	-	-	89.203	3.80015	34.536	1.954
OV19-3
Quartz	20.373	0.294187	-	324.229	7.65947	-	-	-	-
Feldspar	10.0765	-	1.25791	-	-	277.823	7.13602	7.457	0.035
Magnetite	20.591	-	1.14194	-	-	119.561	4.02068	25.912	0.094
97EV14B
Quartz	15.837	0.296279		1834.36	29.7413	-	-	-	-
Feldspar	15.383	-	1.14116	-	-	5724.39	79.2775	16.6001	0.0197843
Magnetite	18.76	-	1.14416	-	-	633.594	28.7316	79.5259	3.51847
Blank 1
Quartz	-	0.294805	-	3.50241	0.971619	-	-	-	-
Feldspar	-	-	1.22708	-	-	4.34391	0.722807	45.51	0.397
Magnetite	-	-	1.12613	-	-	4.15078	1.12729	47.856	0.626
Blank 22
Feldspar	-	-	1.17933	-	-	3.72909	0.866504	55.513	1.293
Blank 33
Feldspar	-	-	1.15229	-	-	70.1423	3.33897	55.174	0.756483
Magnetite	-	-	1.12613	-	-	13.2619	3.6352	47.7227	8.29167
1 The Cl carrier has a 35Cl/37Cl ratio of 273. 2 Blank-2 applies to OV19-3 feldspar only. 3 Blank-3 applies to 97EV14B feldspar and magnetite. For all other samples subtract Blank-1.

## Sheet: Nuclide Concentrations
Table S2. Blank-corrected cosmogenic nuclides concentrations
	[10Be]quartz		[36Cl]feldspar		[36Cl]magnetite
ID	atoms g-1	±	atoms g-1	±	atoms g-1	±
OV19-1	278943	10481.6	631324	16610.3	89354.4	6289.76
OV19-2	286067	8714.96	596814	16184.8	97373.4	4571.34
OV19-3	309879	7460.14	1.13705e+06	29846.7	128566	4609.53
97EV14B	2.29185e+06	37249.1	9.30639e+06	130261	675914	31374
Assume 3 digits are significant.
Legacy data reported in Moore & Granger (2019)1
	[10Be]quartz		[36Cl]feldspar		[36Cl]magnetite
ID	atoms g-1	±	atoms g-1	±	atoms g-1	±
BL15-3 (1)	485847	11101	-	-	220428	7419.16
LL15-2 (1)	546099	9258.05	-	-	247771	7617.17
BL15-1	521007	9052.79	-	-	202528	8791.57
BL15-2	431953	10270	-	-	141501	7844.54
BL15-3 (2)	-	-	-	-	162394	8216.77
BlC15-2	353686	9150.62	-	-	71211.1	18723.8
LL15-1	560370	10855.7	-	-	166469	8576.52
LL15-2 (2)	-	-	-	-	203096	10330.2
1 Chlorine-36 was measured in 2 magnetite aliquots for BL15-3 and LL15-2, denoted by (1) and (2).
References:
Moore, A.K., Granger, D.E., 2019. Calibration of the production rate of cosmogenic 36Cl from Fe. Quaternary Geochronology 51, 87–98.

## Sheet: Target Chemistry
Table S3. Target element concentrations measured by ICP-OES (Fe, Ti, Ca, and K) and isotope-dilution AMS (Cl)
	Fe		Ti		Ca		K		Cl
ID	μg/g	±	μg/g	±	μg/g	±	μg/g	±	μg/g	±
Feldspar
OV19-1F	664.365	8.28834	66.1569	2.41491	12396	195.278	33906	224.584	34.0437	1.81896
OV19-2F	1959.6	72.4166	181.355	5.55816	22429.5	359.244	23136.1	149.443	48.2309	0.420146
OV19-3F	546.627	11.0922	93.3769	1.18657	8399.27	204.332	39231.3	306.414	106.535	1.07977
97EV14B-F	75.5791	1.63464	723.459	19.3725	3654.59	33.9052	96378.9	1560.86	16.7283	0.079758
Magnetite
OV18-1M	735532	11932.1	2065.07	20.921	143.502	23.703	254.077	61.6511	8.00907	0.257339
OV18-2M	739993	8763.33	182.306	10.4638	231.93	13.296	D.L.	-	2.37201	0.490942
OV18-3M	739366	20275.5	1434.12	14.7942	1208.61	18.5939	D.L.	-	4.96672	0.0816204
97EV14B-M	739819	33272.3	5720.74	63.2898	32.4732	8.11942	D.L.	-	D.L.	-
D.L. if less than 3σ from 0
Legacy data reported in Moore and Granger (2019)
	Fe1		Ti		Ca		K		Cl
ID	μg/g	±	μg/g	±	μg/g	±	μg/g	±	μg/g	±
BL15-3 (1)	-	-	-	-	-	-	-	-	19.9013	0.174876
LL15-2 (1)	-	-	-	-	-	-	-	-	17.4978	0.179939
BL15-1	-	-	164.896	1.66186	223.998	0.94232	19.0012	1.20646	7.56203	0.272002
BL15-2	-	-	120.997	0.7739	105.999	1.96752	17.1011	1.00707	1.92223	0.255117
BL15-3 (2)	-	-	143.296	1.02393	249.898	1.96112	22.3014	1.05129	6.80732	0.255681
BlC15-2	-	-	987.573	8.64971	161.299	1.28705	D.L.	-	D.L.	-
LL15-1	-	-	103.997	0.743115	47.5996	1.51826	16.601	1.81994	0.953696	0.253327
LL15-2 (2)	-	-	235.294	1.0673	217.398	1.52145	26.1016	1.82008	10.8742	0.281311
D.L. if less than 3σ from 0.
1 Fe content for stoichiometric magnetite assumed
References:
Moore, A.K., Granger, D.E., 2019. Calibration of the production rate of cosmogenic 36Cl from Fe. Quaternary Geochronology 51, 87–98.

## Sheet: Rock Chemistry
Table S4. Rock compositional data measured by ICP-OES and loss on ignition
Major Elements
	SiO2		TiO2		Al2O3		Fe2O3		MgO		CaO		Na2O		K2O		H2O1
ID	wt. %	±	wt. %	±	wt. %	±	wt. %	±	wt. %	±	wt. %	±	wt. %	±	wt. %	±	wt. %
OV19-1	73.3022	1.857	0.162396	0.00639699	12	0.335596	1.51371	0.0235984	0.229284	0.0114133	1.18751	0.0630251	3.77476	0.0489156	5.17196	0.0888117	0.414988
OV19-2	65.8855	1.73562	0.600966	0.0135732	14.804	0.132273	5.13517	0.252431	1.65023	0.0596051	4.73636	0.358948	3.08364	0.0697615	4.58023	0.307003	1.24283
OV19-3	62.8439	2.6734	0.497409	0.0186892	12.6705	0.688254	3.9184	0.113269	1.32473	0.0861169	3.55293	0.348959	3.65258	0.0709995	4.8449	0.246817	0.254482
97EV14B	69.6426	2.08944	0.348341	0.00417157	14.4595	1.05638	2.75179	0.059636	0.501388	0.0355418	1.54865	0.0429574	3.40067	0.0323084	7.43225	0.343576	0.381922
Trace Elements
	B		Sm		Gd		U		Th		Cr		Li
ID	μg/g	±	μg/g	±	μg/g	±	μg/g	±	μg/g	±	μg/g	±	μg/g	±
OV19-1	D.L.	-	2.57781	0.1468	3.3646	0.0429272	5.51968	0.493248	17.7862	0.217097	14.4686	0.23488	13.0568	1.20478
OV19-2	D.L.	-	3.97793	0.157687	8.00298	0.103089	14.2697	2.94075	12.7581	0.37544	35.2655	0.507577	67.4258	0.504594
OV19-3	D.L.	-	3.98589	0.215201	6.71333	0.13567	12.1167	2.75083	17.3704	0.43508	25.4832	0.353376	10.8723	1.25378
97EV14B	D.L.	-	7.66463	0.403401	7.27852	0.109495	10.3501	2.72008	10.304	0.541711	29.7836	0.431414	16.0175	1.25566
D.L. if less than 3σ from 0
1 Assumes loss on ignition is equivalent to analytical water.
Legacy data reported in Moore and Granger (2019)
Major Elements
	SiO2		TiO2		Al2O3		Fe2O3		MgO		CaO		Na2O		K2O		H2O
ID	wt. %	±	wt. %	±	wt. %	±	wt. %	±	wt. %	±	wt. %	±	wt. %	±	wt. %	±	wt. %
BL15-1	62.7	0.01	0.58	0.01	16.4	0.01	5.18	0.01	2.14	0.01	5.19	0.01	3.45	0.01	3.15	0.01	0.9
BL15-2	66.4	0.01	0.48	0.01	15.9	0.01	3.45	0.01	1.7	0.01	4.11	0.01	3.39	0.01	3.6	0.01	0.8
BL15-3	65.1	0.01	0.46	0.01	15.9	0.01	4.23	0.01	1.69	0.01	4.13	0.01	3.41	0.01	3.53	0.01	0.9
BlC15-2	76.7	0.01	0.07	0.01	13.5	0.01	1.01	0.01	0.24	0.01	2.43	0.01	3.07	0.01	3.36	0.01	0.6
LL15-1	67.7	0.01	0.43	0.01	14.9	0.01	4.13	0.01	1.37	0.01	3.9	0.01	3.11	0.01	3.88	0.01	0.7
LL15-2	68.9	0.01	0.38	0.01	14.6	0.01	3.5	0.01	1.18	0.01	3.26	0.01	2.76	0.01	4.52	0.01	0.6
Trace Elements
	B		Sm		Gd		U		Th		Cr		Li
ID	μg/g	±	μg/g	±	μg/g	±	μg/g	±	μg/g	±	μg/g	±	μg/g	±
BL15-1	5	5	4.3	0.1	3.58	0.05	7.1	0.05	5.3	0.1	117	10	17	10
BL15-2	5	5	3.6	0.1	3.11	0.05	24.9	0.05	27.4	0.1	106	10	25	10
BL15-3	5	5	3.2	0.1	2.67	0.05	5.18	0.05	23.9	0.1	190	10	24	10
BlC15-2	5	5	2.3	0.1	2.04	0.05	11.7	0.05	20.4	0.1	169	10	10	10
LL15-1	5	5	4.1	0.1	3.56	0.05	6.7	0.05	17.7	0.1	286	10	36	10
LL15-2	5	5	3.3	0.1	2.9	0.05	9.15	0.05	39.5	0.1	115	10	23	10
References:
Moore, A.K., Granger, D.E., 2019. Calibration of the production rate of cosmogenic 36Cl from Fe. Quaternary Geochronology 51, 87–98.

## Sheet: Computed Parameters
Table S5. Computed parameters including scaling factors, parameters used in the calibration codes, and calibration results.																											Results
	Pressure	Scaling factors to sample altitude					Scaling factors to site at sea level (i.e., S0 in Eqn. 4)					1radiogenic 36Cl		2misc. prod. mt.		3misc. mt. sp.		4misc. fs.		5K-spallation		6P10 μ	7P10 sp.	P36 fs.			Production rate at site				SLHL production rate				Scaling factor ratio
ID	hPa	36ClFe	36ClTi	36ClCa	36ClK	10Beqtz	36ClFe	36ClTi	36ClCa	36ClK	10Beqtz	36Cl μg Cl-1	±	atoms 36Cl g-1 yr-1	±	atoms 36Cl g-1 yr-1	±	atoms 36Cl g-1 yr-1	±	atoms 36Cl g-1 yr-1	±	atoms 10Be g-1 yr-1	atoms 10Be g-1 yr-1	atoms 36Cl g-1 yr-1	±		Cal. vs 36ClK	±	Cal. vs. 10Beqtz	±	Cal. vs 36ClK	±	Cal. vs. 10Beqtz	±	Cal. vs 36ClK	±	Cal. vs. 10Beqtz	±
New Data (this study)																											atoms g Fe-1 yr-1		atoms g Fe-1 yr-1		atoms g Fe-1 yr-1		atoms g Fe-1 yr-1
OV19-1 13	830.744	4.0426	3.6338	3.2836	3.2395	3.3732	0.89547	0.85255	0.8169	0.81846	0.81666	1026	51.411	2.27184	0.0657474	-	-	2.64757	0.425245	-	-	0.1152	13.2229	28.538	0.445567		2.18974	0.44526	2.30178	0.472503	0.541667	0.110142	0.569381	0.116881	0.467631	0.0950877	0.472572	0.0970082
OV19-2	830.844	4.0466	3.6386	3.2889	3.2442	3.3784	0.89793	0.85614	0.82124	0.8225	0.81823	1292	207.584	0.548513	0.0941943	-	-	4.39668	0.126381	-	-	0.1152	13.2433	24.9787	0.129372		5.21459	0.368524	5.34379	0.374226	1.28863	0.09107	1.32056	0.092479	1.11257	0.0786276	1.09613	0.0767616
OV19-3	830.844	4.0649	3.6599	3.3119	3.2655	3.401	0.9044	0.86549	0.83247	0.83295	0.82274	1479	230.742	1.24824	0.0224771	-	-	1.99177	0.261838	-	-	0.1152	13.3319	42.5314	0.267739		5.43073	0.378548	5.59433	0.361118	1.33601	0.093126	1.37625	0.088838	1.15382	0.0804269	1.14271	0.0737628
97EV14B	602.97	28.0727	23.3646	19.2768	19.0387	20.4204	0.93976	0.90924	0.88253	0.88025	0.89072	817	161.822	-	-	0.903588	0.120062	-	-	285.615	4.62556	-	80.048	-	-		36.8931	2.5556	36.8202	2.49457	1.3142	0.091035	1.3116	0.088861	1.37999	0.0955926	1.28799	0.0872617
Old Data (Moore & Granger 2019)
BL15-1	677.501	13.4812	11.2931	9.4211	9.3313	9.9362	0.86817	0.81902	0.77966	0.78408	0.78317	-	-	-	-	-	-	-	-	-	-	-	-	-	-		-	-	19.3343	1.37521	-	-	1.43417	0.10201	-	-	1.30947	0.0931402
BL15-2	677.671	13.4635	11.2791	9.4102	9.3204	9.9244	0.86819	0.81903	0.77967	0.7841	0.78319	-	-	-	-	-	-	-	-	-	-	-	-	-	-		-	-	18.0958	1.36184	-	-	1.34406	0.101151	-	-	1.22705	0.0923447
BL15-3	677.925	13.4365	11.2577	9.3936	9.3038	9.9065	0.86818	0.81902	0.77967	0.78409	0.78318	-	-	-	-	-	-	-	-	-	-	-	-	-	-		-	-	16.8026	1.34168	-	-	1.25052	0.0998535	-	-	1.14142	0.0911418
LL15-1	680.645	13.2374	11.1124	9.2923	9.1979	9.7931	0.87143	0.82283	0.78376	0.78784	0.7872	-	-	-	-	-	-	-	-	-	-	-	-	-	-		-	-	16.5853	1.11167	-	-	1.25291	0.0839795	-	-	1.14128	0.0764971
LL15-2	681.514	13.1503	11.0438	9.2394	9.1449	9.7358	0.87163	0.82306	0.78401	0.78807	0.78744	-	-	-	-	-	-	-	-	-	-	-	-	-	-		-	-	17.2597	1.37224	-	-	1.31249	0.10435	-	-	1.19477	0.0949905
Production Rates
LSDn Reference Spallation Rates8			Muon and low-energy neutron capture rates11					Fraction of 36Cl production in feldspar by target element
Element	atoms g-1 yr-1		ID	neutron capture	Ca mu	K mu		ID	Cl12	K	Ca	Fe	Ti
36ClFe9	1.32			atoms 36Cl μg Cl-1 yr-1	atoms 36Cl g Ca-1 yr-1	atoms 36Cl g K-1 yr-1		OV19-1	0.279054	0.63702	0.083738	0.000130429	5.70564e-05
36ClTi10	6.5		OV19-1	0.250868	0.025694	0.103		OV19-2	0.355458	0.477442	0.166506	0.000422736	0.000171924
36ClCa	55.5601		OV19-2	0.179912	0.02473	0.098635		OV19-3	0.482297	0.480573	0.0370071	6.97555e-05	5.24334e-05
36ClK	155.655		OV19-3	0.190383	0.02653	0.10677		97EV14B	0.0513579	0.935499	0.0127778	9.15254e-06	0.000356361
10Beqtz	3.92
Notes:
Columns M through X contain computed parameters used for production rate calibration. Production rates are calculated using the target element concentrations reported in "Target Chemistry" and the reference spallation production rates listed in this sheet.
1 amount of 36Cl produced by capture of radiogenic neutrons by 35Cl.
2 production rate of 36Cl in magnetite by pathways other than spallation on Fe (Owens Valley only, used for Fe calibration).
3 production rate of 36Cl in magnetite by spallation on K, Ca, and Ti (Mt. Evans only, used in steady-state erosion calibration).
4 production rate of 36Cl in feldspar occuring through reactions other than spallation on K and neutron capture (Owens Valley only, used for low-energy neutron calibration).
5 production of 36Cl in feldspar through spallation on K (Mt. Evans only, used for Fe calibration).
6 production rate of 10Be in quartz through muon interactions at the surface (Owens Valley only)
7 production rate of 10Be in quartz through spallation.
8 From Marrero et al., 2016 for the nuclide specific scaling model of Lifton et al., 2014 unless otherwise noted.
9 Average determined in this work (including 2019 data).
10 Modeled using the approach described in section 2.1
11 Low-energy neutron capture and muon production rate are treated separately for Mt. Evans in the calibration code.
12 Fraction of production from Cl does not include radiogenic neutron capture, but does include an adjustment to the thermal neutron flux to account for snow (section 2.4.3).
13 OV19-1 is excluded as an outlier from the analysis (section 3.2).
References:
Lifton, N., Sato, T., Dunai, T.J., 2014. Scaling in situ cosmogenic nuclide production rates using analytical approximations to atmospheric cosmic-ray fluxes. Earth and Planetary Science Letters 386, 149–160.
Marrero, S.M., Phillips, F.M., Borchers, B., Lifton, N., Aumer, R., Balco, G., 2016. Cosmogenic nuclide systematics and the CRONUScalc program. Quaternary Geochronology 31, 160–187.

## Sheet: Coefficients
Table S6. Polynomial coefficients for 36ClFe/10Beqtz scaling factor ratios with altitude between cutoff rigidities of 0 and 14 GV.
Polynomial of the form a(1013.25-x)2+b(1013.25-x)+c, where x is air pressure in hPa
Cutoff Rigidity (GV)	a	b	c
0	9.0294e-07	0.00040926	0.99513
1	9.0294e-07	0.00040926	0.99513
2	9.0294e-07	0.00040926	0.99513
3	7.1708e-07	0.00042759	0.9944
4	9.3038e-07	0.00033683	0.99696
5	7.7158e-07	0.00046048	0.99372
6	7.8399e-07	0.00044292	0.99294
7	7.8806e-07	0.00043729	0.99277
8	7.8583e-07	0.0004341	0.99278
9	7.8097e-07	0.00043272	0.99267
10	7.7626e-07	0.00043317	0.99256
11	7.7362e-07	0.00043572	0.99255
12	7.7382e-07	0.00044054	0.99258
13	7.7605e-07	0.00044714	0.9926
14	7.7849e-07	0.00045437	0.99263
