# Supplementary material for: Technical note: Altitude scaling of 36 Cl production from Fe
Source: Copernicus journal article supplement (doi:10.5194/gchron-6-541-2024), 2024-10-18
Supplement: Supplementary file 1 [file gchron-6-541-2024-supplement.zip]

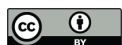

## *Supplement of*

# **Technical note: Altitude scaling of $^{36}\text{Cl}$ production from Fe**

**Angus K. Moore and Darryl E. Granger**

*Correspondence to:* Angus K. Moore ([angus.moore@uclouvain.be](mailto:angus.moore@uclouvain.be))

- [gchron-6-541-2024-supplement-title-page.pdf](#)
- [Supplementary Tables.xlsx](#)

The copyright of individual parts of the supplement might differ from the article licence.
